# Supplementary material
Source: PubMed Central journal article supplement (PMC4135683)
Supplement: JB.01860-14_zjb999093292so1.pdf [file JB.01860-14_zjb999093292so1.pdf]

**TABLE S1.** The regions enriched by ChIP with GntR1 in the *C. glutamicum* genome

| Peak<br>start <sup>a</sup> | Peak<br>end <sup>b</sup> | Peak# | Neighboring<br>gene     | Gene<br>name | Enrichment<br>factor <sup>c</sup> | Gene function                                                                                            |
|----------------------------|--------------------------|-------|-------------------------|--------------|-----------------------------------|----------------------------------------------------------------------------------------------------------|
| 1676016                    | 1676265                  | #132  | <i>cgR_1513</i>         | <i>gnd</i>   | 5.66                              | 6-phosphogluconate dehydrogenase                                                                         |
| 1676016                    | 1676265                  | #132  | <i>cgR_1514</i>         |              | 5.66                              | uncharacterized protein, possibly involved in aromatic compounds catabolism                              |
| 2635673                    | 2635922                  | #196  | <i>cgR_2397</i>         | <i>gntV</i>  | 5.19                              | gluconate kinase                                                                                         |
| 2172711                    | 2172960                  | #157  | <i>cgR_1973</i>         | <i>pyk</i>   | 5.14                              | pyruvate kinase                                                                                          |
| 1622834                    | 1623083                  | #129  | <i>cgR_1469</i>         | <i>uspA2</i> | 5.08                              | universal stress protein UspA or related nucleotide-binding protein                                      |
| 283508                     | 283757                   | #020  | <i>cgR_0261</i>         | <i>iolT1</i> | 5.06                              | metabolite transport protein                                                                             |
| 437450                     | 437699                   | #030  | <i>cgR_0402</i>         | <i>bgIS</i>  | 5.01                              | putative beta-glucosidase                                                                                |
| 3047886                    | 3048135                  | #224  | <i>cgR_2751</i>         | <i>pckA</i>  | 4.91                              | phosphoenolpyruvate carboxykinase                                                                        |
| 3186797                    | 3187046                  | #238  | <i>cgR_2868_(5sRNA)</i> |              | 4.84                              |                                                                                                          |
| 2710180                    | 2710429                  | #203  | <i>cgR_2459</i>         |              | 4.76                              | putative glucuronide permease                                                                            |
| 2710180                    | 2710429                  | #203  | <i>cgR_2460</i>         |              | 4.76                              | SAM-dependent methyltransferase                                                                          |
| 1551313                    | 1551562                  | #120  | <i>cgR_1413</i>         |              | 4.72                              | hypothetical protein                                                                                     |
| 1880912                    | 1881161                  | #144  | <i>cgR_1690</i>         |              | 4.72                              | coenzyme F420-dependent N5,N10-methylene tetrahydromethanopterin reductasetase or related flavin-depende |
| 3211500                    | 3211749                  | #240  | <i>cgR_2895</i>         | <i>maeB</i>  | 4.67                              | malic enzyme                                                                                             |
| 2076208                    | 2076457                  | #149  | <i>cgR_1874</i>         |              | 4.65                              | hypothetical protein                                                                                     |
| 2493581                    | 2493830                  | #186  | <i>cgR_2263</i>         |              | 4.64                              | bacterial regulatory proteins, TetR family                                                               |
| 2493581                    | 2493830                  | #186  | <i>cgR_2262</i>         | <i>mdh</i>   | 4.64                              | malate dehydrogenase                                                                                     |
| 1566524                    | 1566773                  | #124  | <i>cgR_1425</i>         | <i>ptsG</i>  | 4.54                              | phosphotransferase, glucose-specific enzyme II                                                           |
| 1803976                    | 1804225                  | #139  | <i>cgR_1624</i>         | <i>tkt</i>   | 4.46                              | transketolase                                                                                            |

|         |         |      |                         |              |                                                               |
|---------|---------|------|-------------------------|--------------|---------------------------------------------------------------|
| 1803976 | 1804225 | #139 | <i>cgR_1623_5(sRNA)</i> |              | 4.46                                                          |
| 3115510 | 3115759 | #233 | <i>cgR_2806</i>         | <i>gntP</i>  | 4.32 gluconate permease                                       |
| 3115510 | 3115759 | #233 | <i>cgR_2805</i>         | <i>glpQI</i> | 4.32 putative glycerophosphoryl diester phosphodiesterase     |
| 2758270 | 2758519 | #208 | <i>cgR_2497</i>         | <i>dctA</i>  | 4.25 Na <sup>+</sup> /H <sup>+</sup> -dicarboxylate symporter |
| 1822137 | 1822386 | #140 | <i>cgR_1636</i>         | <i>gapA</i>  | 4.24 glyceraldehyde-3-phosphate dehydrogenase                 |
| 2703949 | 2704198 | #202 | <i>cgR_2454</i>         |              | 4.20 sugar phosphate isomerase/epimerase                      |
| 2703949 | 2704198 | #202 | <i>cgR_6140</i>         |              | 4.20 HYPOTHETICAL                                             |
| 479980  | 480229  | #038 | <i>cgR_6020</i>         |              | 4.18 HYPOTHETICAL                                             |
| 1145984 | 1146233 | #087 | <i>cgR_1038</i>         | <i>gapB</i>  | 4.14 glyceraldehyde 3-phosphate dehydrogenase                 |
| 2319038 | 2319287 | #173 | <i>cgR_2102</i>         |              | 4.09 permease of the major facilitator superfamily            |
| 2693878 | 2694127 | #201 | <i>cgR_2451</i>         |              | 3.91 Na <sup>+</sup> /H <sup>+</sup> -dicarboxylate symporter |
| 1554912 | 1555161 | #121 | <i>cgR_6099</i>         |              | 3.82 HYPOTHETICAL                                             |
| 2428132 | 2428381 | #182 | <i>cgR_2199</i>         |              | 3.76 putative membrane protein                                |
| 325095  | 325344  | #023 | <i>cgR_0299</i>         |              | 3.55 sodium:sulfate symporter transmembrane component         |
| 1082299 | 1082548 | #084 | <i>cgR_0973</i>         |              | 3.52 secreted protein related to metalloendopeptidases        |
| 1082299 | 1082548 | #084 | <i>cgR_0974</i>         |              | 3.52 membrane protein                                         |
| 2453906 | 2454155 | #184 | <i>cgR_2222</i>         | <i>dctPI</i> | 3.49 putative C4-dicarboxylate-binding protein                |
| 3106850 | 3107099 | #229 | <i>cgR_2798</i>         |              | 3.44 hypothetical protein                                     |
| 2217713 | 2217962 | #162 | <i>cgR_2015</i>         |              | 3.26 predicted Co/Zn/Cd cation transporter                    |
| 2174407 | 2174656 | #158 | <i>cgR_1974</i>         | <i>lgt</i>   | 3.24 putative prolipoprotein diacylglycerol transferase       |
| 3214457 | 3214706 | #241 | <i>cgR_2896</i>         | <i>gntK</i>  | 3.18 putative gluconate kinase                                |
| 2340750 | 2340999 | #175 | <i>cgR_2120</i>         | <i>aceE</i>  | 3.09 pyruvate dehydrogenase                                   |
| 2752328 | 2752577 | #207 | <i>cgR_2493</i>         | <i>purS</i>  | 3.06 phosphoribosylformylglycinamide synthase component       |

|         |         |      |                 |              |      |                                                                                        |
|---------|---------|------|-----------------|--------------|------|----------------------------------------------------------------------------------------|
| 1123410 | 1123659 | #086 | <i>cgR_1017</i> |              | 2.98 | hypothetical protein                                                                   |
| 1374000 | 1374249 | #102 | <i>cgR_1253</i> |              | 2.80 | hypothetical protein                                                                   |
| 1374000 | 1374249 | #102 | <i>cgR_1254</i> |              | 2.80 | bacterial regulatory proteins, crp family                                              |
| 1561578 | 1561827 | #122 | <i>cgR_1421</i> |              | 2.79 | hypothetical protein                                                                   |
| 113374  | 113623  | #009 | <i>cgR_0096</i> | <i>copO</i>  | 2.72 | creatinine deaminase                                                                   |
| 2928826 | 2929075 | #220 | <i>cgR_2647</i> |              | 2.68 | Na <sup>+</sup> /phosphate symporter                                                   |
| 2928826 | 2929075 | #220 | <i>cgR_2646</i> |              | 2.68 | permease of the major facilitator superfamily[nebacterium glutamicum]                  |
| 773660  | 773909  | #061 | <i>cgR_0713</i> |              | 2.64 | hypothetical protein                                                                   |
| 1183886 | 1184135 | #089 | <i>cgR_1069</i> | <i>porB</i>  | 2.60 | hypothetical protein                                                                   |
| 1183886 | 1184135 | #089 | <i>cgR_1070</i> |              | 2.60 | hypothetical protein                                                                   |
| 1859723 | 1859972 | #143 | <i>cgR_1674</i> |              | 2.55 | ABC-type cobalamin/Fe <sup>3+</sup> -siderophores transport system, permease component |
| 868711  | 868960  | #074 | <i>cgR_0784</i> | <i>icd</i>   | 2.52 | isocitrate dehydrogenase                                                               |
| 26848   | 27097   | #002 | <i>cgR_0026</i> |              | 2.49 | 5'-nucleotidase (putative pseudogene)                                                  |
| 505522  | 505771  | #044 | <i>cgR_0453</i> | <i>mfsR</i>  | 2.46 | Transcriptional regulator, TetR family                                                 |
| 740086  | 740335  | #060 | <i>cgR_0682</i> | <i>rpsD</i>  | 2.41 | 30S ribosomal protein S4                                                               |
| 449962  | 450211  | #032 | <i>cgR_0412</i> | <i>ushA</i>  | 2.29 | probable 5'-nucleotidase precursor                                                     |
| 2814253 | 2814502 | #214 | <i>cgR_2547</i> | <i>ptsS</i>  | 2.29 | enzyme II sucrose protein                                                              |
| 2124358 | 2124607 | #152 | <i>cgR_1934</i> | <i>pcaB2</i> | 2.27 | putative 3-carboxy-cis,cis-muconate cycloisomerase                                     |
| 2418995 | 2419244 | #181 | <i>cgR_2192</i> | <i>ptxB</i>  | 2.24 | probable phosphite transport system binding protein                                    |
| 2626838 | 2627087 | #194 | <i>cgR_2388</i> | <i>betT</i>  | 2.22 | high-affinity choline transport protein                                                |
| 2626838 | 2627087 | #194 | <i>cgR_6135</i> |              | 2.22 | HYPOTHETICAL                                                                           |
| 448074  | 448323  | #031 | <i>cgR_0412</i> | <i>ushA</i>  | 2.22 | probable 5'-nucleotidase precursor                                                     |
| 476055  | 476304  | #036 | <i>cgR_6017</i> |              | 2.21 | HYPOTHETICAL                                                                           |

|         |         |      |                         |              |      |                                                                                      |
|---------|---------|------|-------------------------|--------------|------|--------------------------------------------------------------------------------------|
| 2092945 | 2093194 | #150 | <i>cgR_1893</i>         |              | 2.20 | ClpP protease family protein                                                         |
| 1350148 | 1350397 | #099 | <i>cgR_1235</i>         |              | 2.17 | NTP pyrophosphohydrolase                                                             |
| 416468  | 416717  | #028 | <i>cgR_0382</i>         |              | 1.97 | putative serine protease, membrane protein                                           |
| 416468  | 416717  | #028 | <i>cgR_0383</i>         |              | 1.97 | hydrolase or acyltransferase                                                         |
| 2103149 | 2103398 | #151 | <i>cgR_1906</i>         |              | 1.94 | putative single-strand binding protein                                               |
| 87275   | 87524   | #006 | <i>cgR_0076</i>         |              | 1.94 | hypothetical protein                                                                 |
| 2312827 | 2313076 | #171 | <i>cgR_2094</i>         |              | 1.83 | hypothetical protein                                                                 |
| 510201  | 510450  | #045 | <i>cgR_0457</i>         | <i>deoC</i>  | 1.82 | deoxyribose-phosphate aldolase                                                       |
| 1543965 | 1544214 | #117 | <i>cgR_1409</i>         | <i>int1</i>  | 1.80 | probable phage-type integrase                                                        |
| 2244607 | 2244856 | #164 | <i>cgR_2037</i>         | <i>ftsZ</i>  | 1.79 | cell division GTPase                                                                 |
| 1045645 | 1045894 | #083 | <i>cgR_0946</i>         |              | 1.74 | hypothetical protein                                                                 |
| 1045645 | 1045894 | #083 | <i>cgR_0945</i>         | <i>accDA</i> | 1.74 | acetyl-coenzyme A carboxylase carboxyl transferase                                   |
| 2795120 | 2795369 | #212 | <i>cgR_2529</i>         | <i>thrE</i>  | 1.71 | threonine export carrier                                                             |
| 2352016 | 2352265 | #177 | <i>cgR_2130</i>         |              | 1.68 | hypothetical protein                                                                 |
| 2352016 | 2352265 | #177 | <i>cgR_2130_5(sRNA)</i> |              | 1.68 |                                                                                      |
| 1111039 | 1111288 | #085 | <i>cgR_1006</i>         | <i>metS</i>  | 1.63 | methionyl-tRNA synthetase                                                            |
| 426543  | 426792  | #029 | <i>cgR_0394</i>         | <i>cspA2</i> | 1.63 | cold-shock protein                                                                   |
| 821019  | 821268  | #067 | <i>cgR_0747</i>         |              | 1.60 | nucleoside-diphosphate-sugar epimerase                                               |
| 2391628 | 2391877 | #179 | <i>cgR_2169</i>         | <i>malQ</i>  | 1.60 | 4-alpha-glucanotransferase                                                           |
| 473758  | 474007  | #035 | <i>cgR_0435</i>         |              | 1.57 | hypothetical protein                                                                 |
| 1499429 | 1499678 | #112 | <i>cgR_1365</i>         |              | 1.57 | putative aliphatic sulfonates uptake ABC transporter secreted solute-binding protein |
| 1279187 | 1279436 | #093 | <i>cgR_1170</i>         |              | 1.56 | putative membrane protein                                                            |
| 2768358 | 2768607 | #210 | <i>cgR_2506</i>         |              | 1.54 | SAM-dependent methyltransferase                                                      |

|         |         |      |                  |              |      |                                                                                                          |
|---------|---------|------|------------------|--------------|------|----------------------------------------------------------------------------------------------------------|
| 2133493 | 2133742 | #153 | <i>cgR_1945</i>  | <i>srp</i>   | 1.51 | signal recognition particle GTPase                                                                       |
| 2284993 | 2285242 | #168 | <i>cgR_2070</i>  | <i>nlpC</i>  | 1.49 | hypothetical protein                                                                                     |
| 112141  | 112390  | #008 | <i>cgR_0095</i>  | <i>crnT</i>  | 1.48 | permease of the major facilitator superfamily                                                            |
| 1333476 | 1333725 | #097 | <i>cgR_1223</i>  | <i>metE</i>  | 1.48 | homocysteine methyltransferase                                                                           |
| 1333476 | 1333725 | #097 | <i>cgR_1224</i>  |              | 1.48 | hypothetical protein                                                                                     |
| 2204477 | 2204726 | #159 | <i>cgR_2005</i>  |              | 1.45 | coenzyme F420-dependent N5,N10-methylene tetrahydromethanopterin reductasetase or related flavin-depende |
| 541217  | 541466  | #047 | <i>cgR_5003</i>  |              | 1.45 | hypothetical protein                                                                                     |
| 471653  | 471902  | #034 | <i>cgR_0434</i>  | <i>nrfC</i>  | 1.43 | UDP-N-acetylglucosamine 2-epimerase                                                                      |
| 471653  | 471902  | #034 | <i>cgR_0433</i>  | <i>cmtI</i>  | 1.43 | trehalose corynomycolyl transferase                                                                      |
| 2676354 | 2676603 | #200 | <i>cgR_2434</i>  | <i>gntRI</i> | 1.39 | bacterial regulatory proteins, GntR family                                                               |
| 820275  | 820524  | #066 | <i>cgR_0746</i>  |              | 1.39 | transcriptional regulator, MarR family                                                                   |
| 253339  | 253588  | #019 | <i>cgR_0235</i>  |              | 1.37 | membrane protein                                                                                         |
| 3235474 | 3235723 | #243 | <i>cgR_2915</i>  | <i>trpP</i>  | 1.36 | tryptophan-specific permease, 5-methyltryptophan resistance                                              |
| 2892243 | 2892492 | #219 | <i>cgR_2618</i>  |              | 1.35 | hypothetical protein                                                                                     |
| 898710  | 898959  | #077 | <i>cgR_0812</i>  |              | 1.35 | cobalamin synthesis protein/P47K                                                                         |
| 898710  | 898959  | #077 | <i>cgR_0811</i>  |              | 1.35 | secreted protein                                                                                         |
| 2846057 | 2846306 | #216 | <i>cgR_2579</i>  |              | 1.34 | uncharacterized enzyme involved in biosynthesis of extracellular polysaccharides                         |
| 618037  | 618286  | #054 | <i>cgR_0559</i>  |              | 1.31 | probable DNA invertase                                                                                   |
| 104577  | 104826  | #007 | <i>ribosomal</i> |              | 1.26 |                                                                                                          |
| 1600884 | 1601133 | #128 | <i>cgR_1449</i>  | <i>ugpC</i>  | 1.22 | ABC-type sugar transport systems, ATPase component                                                       |
| 3112865 | 3113114 | #232 | <i>cgR_2803</i>  |              | 1.22 | putative secreted protein                                                                                |
| 1361111 | 1361360 | #100 | <i>cgR_1244</i>  |              | 1.18 | putative secreted lipoprotein                                                                            |
| 3105701 | 3105950 | #228 | <i>cgR_2797</i>  |              | 1.18 | hypothetical protein                                                                                     |

|         |         |      |                         |             |      |                                                   |
|---------|---------|------|-------------------------|-------------|------|---------------------------------------------------|
| 3255486 | 3255735 | #244 | <i>cgR_2937</i>         |             | 1.18 | putative oxidoreductase protein                   |
| 1562548 | 1562797 | #123 | <i>cgR_1422</i>         | <i>dkgX</i> | 1.17 | putative 2,5-diketo-D-gluconic acid reductasetase |
| 466096  | 466345  | #033 | <i>cgR_0426</i>         |             | 1.16 | hypothetical protein                              |
| 1155037 | 1155286 | #088 | <i>cgR_1046</i>         |             | 1.16 | putative multicopper oxidase                      |
| 2742260 | 2742509 | #206 | <i>cgR_2485</i>         |             | 1.15 | conserved hypothetical protein-fragment           |
| 487766  | 488015  | #043 | <i>cgR_0436</i>         |             | 1.15 | putative glycosyltransferase                      |
| 1378484 | 1378733 | #104 | <i>cgR_1257_5(sRNA)</i> |             | 1.14 |                                                   |
| 779669  | 779918  | #062 | <i>cgR_0720</i>         |             | 1.13 | hypothetical protein                              |
| 2557253 | 2557502 | #188 | <i>cgR_2324</i>         |             | 1.11 | putative transposase                              |
| 2557253 | 2557502 | #188 | <i>cgR_2323</i>         |             | 1.11 | putative transposase                              |
| 610643  | 610892  | #053 | <i>cgR_0551</i>         |             | 1.08 | hypothetical protein                              |
| 884827  | 885076  | #076 | <i>cgR_0800</i>         | <i>dac</i>  | 1.08 | D-alanyl-D-alanine carboxypeptidase               |
| 1584006 | 1584255 | #127 | <i>cgR_1436</i>         | <i>qor2</i> | 1.06 | NADPH-dependent quinone oxidoreductase            |
| 1584006 | 1584255 | #127 | <i>cgR_1435</i>         | <i>qorR</i> | 1.06 | transcriptional regulator, HxIR family            |
| 209335  | 209584  | #015 | <i>cgR_0190</i>         | <i>panB</i> | 1.05 | 3-methyl-2-oxobutanoate hydroxymethyltransferase  |
| 17147   | 17396   | #001 | <i>cgR_0016</i>         | <i>maoN</i> | 1.04 | monoamine oxidase N                               |
| 2397039 | 2397288 | #180 | <i>cgR_2173</i>         | <i>dcp</i>  | 1.03 | probable peptidyl-dipeptidase A protein           |
| 2273010 | 2273259 | #166 | <i>cgR_2060</i>         | <i>aroG</i> | 1.03 | phospho-2-dehydro-3-deoxyheptonate aldolase       |
| 2576410 | 2576659 | #190 | <i>cgR_2342</i>         |             | 1.02 | hypothetical protein                              |
| 2576410 | 2576659 | #190 | <i>cgR_2341</i>         |             | 1.02 | ABC transporter, substrate-binding protein        |
| 1452713 | 1452962 | #111 | <i>cgR_1321</i>         | <i>ligA</i> | 1.01 | DNA ligase                                        |
| 1041954 | 1042203 | #082 | <i>cgR_0942</i>         |             | 0.99 | phosphoserine aminotransferase                    |
| 1041954 | 1042203 | #082 | <i>cgR_0943</i>         | <i>gltA</i> | 0.99 | citrate synthase                                  |

|         |         |      |                         |              |      |                                                                           |
|---------|---------|------|-------------------------|--------------|------|---------------------------------------------------------------------------|
| 1041954 | 1042203 | #082 | <i>cgR_0942_3(sRNA)</i> |              | 0.99 |                                                                           |
| 2883015 | 2883264 | #218 | <i>cgR_2612</i>         |              | 0.99 | rhodanese-related sulfurtransferase                                       |
| 2348740 | 2348989 | #176 | <i>cgR_2128</i>         | <i>nagD</i>  | 0.99 | putative phosphatase in N-acetylglucosamine metabolism                    |
| 2348740 | 2348989 | #176 | <i>cgR_2127</i>         |              | 0.99 | acyl carrier protein (ACP)                                                |
| 2348740 | 2348989 | #176 | <i>cgR_2126</i>         |              | 0.99 | predicted hydrolase or acyltransferase                                    |
| 1916459 | 1916708 | #147 | <i>cgR_1724</i>         | <i>ribD</i>  | 0.99 | riboflavin specific deaminase                                             |
| 557436  | 557685  | #050 | <i>cgR_0499</i>         |              | 0.98 | uroporphyrinogen III synthase/methyltransferase                           |
| 557436  | 557685  | #050 | <i>cgR_0498</i>         |              | 0.98 | iron/thiamine transport system, secreted component                        |
| 557436  | 557685  | #050 | <i>cgR_0498_5(sRNA)</i> |              | 0.98 | #N/A                                                                      |
| 1543144 | 1543393 | #116 | <i>cgR_1408</i>         |              | 0.97 | putative membrane protein                                                 |
| 2225433 | 2225682 | #163 | <i>cgR_2021</i>         | <i>lspA</i>  | 0.96 | lipoprotein signal peptidase                                              |
| 2634588 | 2634837 | #195 | <i>cgR_2396</i>         |              | 0.96 | putative glucuronide carrier protein                                      |
| 323144  | 323393  | #022 | <i>cgR_0298</i>         | <i>mgtE2</i> | 0.94 | Mg <sup>2+</sup> transporter                                              |
| 323144  | 323393  | #022 | <i>cgR_0297</i>         | <i>pat</i>   | 0.94 | phenylalanine aminotransferase                                            |
| 1793427 | 1793676 | #138 | <i>cgR_1617</i>         | <i>mptB</i>  | 0.93 | putative membrane protein                                                 |
| 1793427 | 1793676 | #138 | <i>cgR_1616</i>         | <i>sufR</i>  | 0.93 | transcriptional regulator, ArsR family                                    |
| 192770  | 193019  | #014 | <i>cgR_0174</i>         |              | 0.93 | putative oxidoreductase                                                   |
| 1338479 | 1338728 | #098 | <i>cgR_1228</i>         |              | 0.92 | predicted hydrolase or acyltransferase (alpha/beta hydrolase superfamily) |
| 1338479 | 1338728 | #098 | <i>cgR_1229</i>         |              | 0.92 | non-ribosomal peptide synthetase module and related proteins              |
| 222754  | 223003  | #016 | <i>cgR_0204</i>         |              | 0.92 | ABC-2 type transporter                                                    |
| 1548568 | 1548817 | #119 | <i>cgR_5025</i>         |              | 0.91 | hypothetical protein                                                      |
| 1501139 | 1501388 | #113 | <i>cgR_1367</i>         | <i>dnaQ</i>  | 0.91 | DNA polymerase III, epsilon subunit, putative                             |
| 2161986 | 2162235 | #155 | <i>cgR_1965</i>         | <i>glxK</i>  | 0.90 | putative glycerate kinase                                                 |

|         |         |      |                 |              |      |                                           |
|---------|---------|------|-----------------|--------------|------|-------------------------------------------|
| 2161986 | 2162235 | #155 | <i>cgR_1964</i> | <i>gdh</i>   | 0.90 | NADP-specific glutamate dehydrogenase     |
| 2660543 | 2660792 | #198 | <i>cgR_2417</i> | <i>murI</i>  | 0.89 | glutamate racemase                        |
| 2660543 | 2660792 | #198 | <i>cgR_2418</i> |              | 0.89 | putative secreted protein                 |
| 180364  | 180613  | #012 | <i>cgR_6006</i> |              | 0.89 | HYPOTHETICAL                              |
| 180364  | 180613  | #012 | <i>cgR_0164</i> |              | 0.89 | transcriptional regulator, MerR family    |
| 2806302 | 2806551 | #213 | <i>cgR_2539</i> |              | 0.89 | hypothetical protein                      |
| 2336764 | 2337013 | #174 | <i>cgR_2114</i> |              | 0.89 | hypothetical protein                      |
| 852307  | 852556  | #072 | <i>cgR_0773</i> |              | 0.89 | putative peptidase                        |
| 3099717 | 3099966 | #227 | <i>cgR_2792</i> |              | 0.89 | hypothetical protein                      |
| 3163789 | 3164038 | #236 | <i>cgR_2852</i> | <i>uspA3</i> | 0.88 | universal stress protein family           |
| 1891024 | 1891273 | #145 | <i>cgR_1699</i> | <i>rel</i>   | 0.88 | PPGPP synthetase, PPGPP pyrophosphorylase |
| 3111763 | 3112012 | #231 | <i>cgR_2803</i> |              | 0.88 | putative secreted protein                 |
| 799705  | 799954  | #063 | <i>cgR_0734</i> |              | 0.88 | hypothetical protein                      |
| 799705  | 799954  | #063 | <i>cgR_6048</i> |              | 0.88 | HYPOTHETICAL                              |
| 799705  | 799954  | #063 | <i>cgR_6047</i> |              | 0.88 | HYPOTHETICAL                              |
| 3095328 | 3095577 | #226 | <i>cgR_2789</i> |              | 0.87 | putative type 1 fimbrial major subunit    |
| 2653569 | 2653818 | #197 | <i>cgR_6137</i> | <i>mepA</i>  | 0.87 | HYPOTHETICAL                              |
| 2653569 | 2653818 | #197 | <i>cgR_2409</i> |              | 0.87 | hypothetical protein                      |
| 860606  | 860855  | #073 | <i>cgR_0778</i> | <i>prpB2</i> | 0.85 | 2-Methylisocitrate lyase                  |
| 2973547 | 2973796 | #223 | <i>cgR_2686</i> | <i>ald</i>   | 0.85 | aldehyde dehydrogenase                    |
| 1669257 | 1669506 | #131 | <i>cgR_1506</i> |              | 0.84 | putative secreted protein                 |
| 2308318 | 2308567 | #170 | <i>cgR_2091</i> |              | 0.84 | predicted permease                        |
| 1688874 | 1689123 | #133 | <i>cgR_1526</i> | <i>ndh</i>   | 0.84 | NADH dehydrogenase                        |



|         |         |      |                 |              |      |                                                                                           |
|---------|---------|------|-----------------|--------------|------|-------------------------------------------------------------------------------------------|
| 1688874 | 1689123 | #133 | <i>cgR_1527</i> | <i>ufaA</i>  | 0.84 | putative cyclopropane fatty acid synthase (cyclopropane-fatty-acyl-phospholipid synthase) |
| 2673169 | 2673418 | #199 | <i>cgR_2431</i> | <i>ctaD</i>  | 0.84 | cytochrome aa3 oxidase, subunit I                                                         |
| 484049  | 484298  | #040 | <i>cgR_0436</i> |              | 0.83 | putative glycosyltransferase                                                              |
| 1582484 | 1582733 | #126 | <i>cgR_6104</i> |              | 0.83 | HYPOTHETICAL                                                                              |
| 527904  | 528153  | #046 | <i>cgR_0472</i> | <i>fadD5</i> | 0.83 | long-chain-fatty-acid-CoA ligase                                                          |
| 40518   | 40767   | #003 | <i>cgR_0034</i> |              | 0.83 | probable glycosyltransferase                                                              |
| 2596203 | 2596452 | #191 | <i>cgR_2359</i> |              | 0.82 | putative membrane protein                                                                 |
| 2596203 | 2596452 | #191 | <i>cgR_2360</i> | <i>phoB</i>  | 0.82 | alkaline phosphatase precursor                                                            |
| 929314  | 929563  | #080 | <i>cgR_0839</i> |              | 0.82 | hypothetical protein                                                                      |
| 1422319 | 1422568 | #109 | <i>cgR_1293</i> |              | 0.82 | hypothetical protein                                                                      |
| 486966  | 487215  | #042 | <i>cgR_0436</i> |              | 0.81 | putative glycosyltransferase                                                              |
| 2366789 | 2367038 | #178 | <i>cgR_2143</i> | <i>glmS</i>  | 0.81 | probable glucosamine--fructose-6-phosphate aminotransferase                               |
| 824663  | 824912  | #069 | <i>cgR_6058</i> |              | 0.81 | HYPOTHETICAL                                                                              |
| 244523  | 244772  | #017 | <i>cgR_0229</i> |              | 0.81 | hypothetical protein                                                                      |
| 726651  | 726900  | #058 | <i>cgR_0668</i> | <i>secY</i>  | 0.81 | preprotein translocase subunit                                                            |
| 726651  | 726900  | #058 | <i>cgR_0667</i> |              | 0.81 | bacterial regulatory proteins, IclR family                                                |
| 1252924 | 1253173 | #092 | <i>cgR_1143</i> |              | 0.81 | PEP phosphonmutase or related enzyme                                                      |
| 1574218 | 1574467 | #125 | <i>cgR_1430</i> | <i>uriT</i>  | 0.80 | uridine transporter                                                                       |
| 573998  | 574247  | #051 | <i>cgR_0513</i> |              | 0.80 | ABC transporter permease protein                                                          |
| 2441431 | 2441680 | #183 | <i>cgR_2212</i> | <i>aceA</i>  | 0.79 | isocitrate lyase                                                                          |
| 2441431 | 2441680 | #183 | <i>cgR_2211</i> | <i>aceB</i>  | 0.79 | malate synthase                                                                           |
| 737010  | 737259  | #059 | <i>cgR_0677</i> |              | 0.78 | putative cellulose synthase protein                                                       |
| 86355   | 86604   | #005 | <i>cgR_0076</i> |              | 0.78 | hypothetical protein                                                                      |

|         |         |      |                 |              |      |                                                    |
|---------|---------|------|-----------------|--------------|------|----------------------------------------------------|
| 546114  | 546363  | #048 | <i>cgR_0490</i> |              | 0.78 | hypothetical protein                               |
| 1690801 | 1691050 | #134 | <i>cgR_1528</i> |              | 0.77 | permease of the major facilitator superfamily      |
| 407684  | 407933  | #027 | <i>cgR_0371</i> |              | 0.77 | putative transcription regulator protein, MarR fam |
| 407684  | 407933  | #027 | <i>cgR_0372</i> |              | 0.77 | 3-oxoacyl-(acyl-carrier protein) reductase         |
| 407684  | 407933  | #027 | <i>cgR_0373</i> |              | 0.77 | metal-dependent hydrolase of the TIM-barrel fold   |
| 635804  | 636053  | #055 | <i>cgR_0576</i> | <i>ispB</i>  | 0.76 | putative octaprenyl-diphosphate synthase protein   |
| 635804  | 636053  | #055 | <i>cgR_0577</i> | <i>secE</i>  | 0.76 | SecE subunit of protein translocation complex      |
| 2150598 | 2150847 | #154 | <i>cgR_1953</i> |              | 0.76 | putative membrane protein                          |
| 1507612 | 1507861 | #114 | <i>cgR_1373</i> |              | 0.75 | putative membrane protein                          |
| 1908293 | 1908542 | #146 | <i>cgR_1714</i> | <i>pgsA1</i> | 0.74 | phosphatidylglycerophosphate synthase              |
| 651467  | 651716  | #056 | <i>cgR_0590</i> |              | 0.74 | secreted protein                                   |
| 2622613 | 2622862 | #193 | <i>cgR_2386</i> | <i>lppS</i>  | 0.74 | secreted lipoprotein ErfK/YbiS/YcfS/YnhG family    |
| 1189224 | 1189473 | #090 | <i>cgR_1076</i> | <i>ripA</i>  | 0.73 | AraC-type DNA-binding domain-containing protein    |
| 1286119 | 1286368 | #094 | <i>cgR_1180</i> |              | 0.73 | putative secreted protein                          |
| 1692420 | 1692669 | #135 | <i>cgR_1528</i> |              | 0.73 | permease of the major facilitator superfamily      |
| 1243746 | 1243995 | #091 | <i>cgR_1132</i> |              | 0.72 | Major facilitator superfamily permease             |
| 1243746 | 1243995 | #091 | <i>cgR_1133</i> |              | 0.72 | putative transcriptional regulator                 |
| 1243746 | 1243995 | #091 | <i>cgR_1134</i> |              | 0.72 | hypothetical protein                               |
| 361172  | 361421  | #024 | <i>cgR_0324</i> |              | 0.72 | hypothetical protein                               |
| 1305982 | 1306231 | #096 | <i>cgR_1201</i> | <i>glgA</i>  | 0.71 | glycosyl transferase                               |
| 1305982 | 1306231 | #096 | <i>cgR_1202</i> | <i>glgC</i>  | 0.71 | ADP-glucose pyrophosphorylase                      |
| 3206177 | 3206426 | #239 | <i>cgR_2890</i> |              | 0.71 | hypothetical protein                               |
| 822520  | 822769  | #068 | <i>cgR_0747</i> |              | 0.71 | nucleoside-diphosphate-sugar epimerase             |

|         |         |      |                 |              |      |                                                                                                      |
|---------|---------|------|-----------------|--------------|------|------------------------------------------------------------------------------------------------------|
| 1390691 | 1390940 | #106 | <i>cgR_1266</i> | <i>narJ</i>  | 0.70 | nitrate reductasetase delta chain                                                                    |
| 2539501 | 2539750 | #187 | <i>cgR_2305</i> |              | 0.70 | hypothetical protein                                                                                 |
| 1375608 | 1375857 | #103 | <i>cgR_1256</i> | <i>ctpC</i>  | 0.70 | cation transport ATPase                                                                              |
| 2872834 | 2873083 | #217 | <i>cgR_2601</i> | <i>ppa</i>   | 0.69 | inorganic pyrophosphatase                                                                            |
| 2872834 | 2873083 | #217 | <i>cgR_2600</i> | <i>dacB</i>  | 0.69 | penicillin-binding protein, D-Ala-D-Ala carboxypeptidase                                             |
| 485333  | 485582  | #041 | <i>cgR_0436</i> |              | 0.69 | putative glycosyltransferase                                                                         |
| 2773807 | 2774056 | #211 | <i>cgR_2511</i> | <i>phoR</i>  | 0.68 | two component response regulator                                                                     |
| 2280617 | 2280866 | #167 | <i>cgR_2066</i> | <i>plsC</i>  | 0.68 | 1-acyl-SN-glycerol-3-phosphate acetyltransferase                                                     |
| 1545527 | 1545776 | #118 | <i>cgR_6092</i> |              | 0.67 | HYPOTHETICAL                                                                                         |
| 2558213 | 2558462 | #189 | <i>cgR_2325</i> |              | 0.66 | putative transcription regulator                                                                     |
| 247890  | 248139  | #018 | <i>cgR_6011</i> |              | 0.66 | HYPOTHETICAL                                                                                         |
| 848089  | 848338  | #070 | <i>cgR_0768</i> |              | 0.65 | putative membrane transport protein                                                                  |
| 963596  | 963845  | #081 | <i>cgR_0875</i> |              | 0.65 | hypothetical protein                                                                                 |
| 2840810 | 2841059 | #215 | <i>cgR_2574</i> | <i>mutY</i>  | 0.65 | A/G-specific adenine glycosylase                                                                     |
| 2840810 | 2841059 | #215 | <i>cgR_2573</i> | <i>cynT</i>  | 0.65 | carbonic anhydrase                                                                                   |
| 879311  | 879560  | #075 | <i>cgR_0795</i> |              | 0.64 | ABC-type cobalamin/Fe <sup>3+</sup> -siderophores transport system, ATPase component                 |
| 2294023 | 2294272 | #169 | <i>cgR_2077</i> | <i>ltsA</i>  | 0.64 | glutamine-dependent amidotransferase involved in formation of cell wall and L-glutamate biosynthesis |
| 2725578 | 2725827 | #205 | <i>cgR_2469</i> | <i>sucC</i>  | 0.64 | succinyl-CoA synthetase beta chain                                                                   |
| 1757074 | 1757323 | #136 | <i>cgR_1587</i> | <i>mcmB</i>  | 0.64 | methylmalonyl-CoA mutase large subunit                                                               |
| 916977  | 917226  | #078 | <i>cgR_0827</i> | <i>dtsR2</i> | 0.63 | acetyl/propionyl CoA carboxylase, beta subunit                                                       |
| 123931  | 124180  | #010 | <i>cgR_0109</i> | <i>ureD</i>  | 0.63 | urease accessory protein                                                                             |
| 1400438 | 1400687 | #107 | <i>cgR_1272</i> |              | 0.63 | membrane protein containing CBS domain                                                               |
| 1849744 | 1849993 | #142 | <i>cgR_1661</i> | <i>pyrB</i>  | 0.63 | aspartate carbamoyltransferase catalytic chain                                                       |

|         |         |      |                 |             |      |                                                                 |
|---------|---------|------|-----------------|-------------|------|-----------------------------------------------------------------|
| 607235  | 607484  | #052 | <i>cgR_0547</i> |             | 0.63 | hypothetical protein                                            |
| 2212106 | 2212355 | #160 | <i>cgR_2012</i> |             | 0.63 | similar to methionine synthase II (cobalamin-independent)       |
| 2317735 | 2317984 | #172 | <i>cgR_2101</i> |             | 0.62 | permease of the major facilitator superfamily                   |
| 2317735 | 2317984 | #172 | <i>cgR_2100</i> |             | 0.62 | hypothetical protein                                            |
| 2317735 | 2317984 | #172 | <i>cgR_2099</i> | <i>thrC</i> | 0.62 | threonine synthase                                              |
| 52798   | 53047   | #004 | <i>cgR_0046</i> |             | 0.61 | probable ABC transport protein, ATP-binding component           |
| 2722540 | 2722789 | #204 | <i>cgR_2467</i> |             | 0.61 | hypothetical protein                                            |
| 1986263 | 1986512 | #148 | <i>cgR_1790</i> | <i>bioN</i> | 0.61 | predicted permease (cobalt permease subfamily)                  |
| 928179  | 928428  | #079 | <i>cgR_0838</i> |             | 0.61 | short chain dehydrogenase, N-terminal fragment                  |
| 928179  | 928428  | #079 | <i>cgR_6062</i> |             | 0.61 | HYPOTHETICAL                                                    |
| 1424878 | 1425127 | #110 | <i>cgR_1297</i> |             | 0.61 | thioredoxin domain-containing protein                           |
| 1424878 | 1425127 | #110 | <i>cgR_1295</i> |             | 0.61 | glyoxalase/bleomycin resistance/dioxygenase superfamily protein |
| 1424878 | 1425127 | #110 | <i>cgR_1296</i> |             | 0.61 | hypothetical protein                                            |
| 1406925 | 1407174 | #108 | <i>cgR_1278</i> | <i>rho</i>  | 0.60 | transcription termination factor Rho                            |
| 2940619 | 2940868 | #221 | <i>cgR_2655</i> | <i>ackA</i> | 0.60 | acetate kinase                                                  |
| 3061361 | 3061610 | #225 | <i>cgR_2760</i> | <i>pks</i>  | 0.60 | polyketide synthase                                             |
| 131433  | 131682  | #011 | <i>cgR_0112</i> |             | 0.59 | putative heat shock protein (HSP90-family)                      |
| 370112  | 370361  | #026 | <i>cgR_0330</i> |             | 0.57 | putative membrane protein                                       |
| 3109494 | 3109743 | #230 | <i>cgR_2801</i> |             | 0.56 | putative aminotransferase                                       |
| 3134797 | 3135046 | #235 | <i>cgR_2822</i> |             | 0.56 | putative GntR-family regulatory protein                         |
| 3134797 | 3135046 | #235 | <i>cgR_2821</i> |             | 0.56 | putative amino acid symporter                                   |
| 1759494 | 1759743 | #137 | <i>cgR_1589</i> |             | 0.56 | putative membrane protein                                       |
| 1759494 | 1759743 | #137 | <i>cgR_1588</i> | <i>mcmA</i> | 0.56 | methylmalonyl-CoA mutase small subunit                          |

|         |         |      |                 |              |      |                                                                     |
|---------|---------|------|-----------------|--------------|------|---------------------------------------------------------------------|
| 2609875 | 2610124 | #192 | <i>cgR_2373</i> | <i>cspB</i>  | 0.56 | PS2 protein                                                         |
| 2609875 | 2610124 | #192 | <i>cgR_2374</i> |              | 0.56 | hypothetical protein                                                |
| 3168341 | 3168590 | #237 | <i>cgR_6154</i> |              | 0.56 | HYPOTHETICAL                                                        |
| 814365  | 814614  | #065 | <i>cgR_6056</i> | <i>crtYe</i> | 0.56 | C50 CAROTENOID EPSILON CYCLASE                                      |
| 1380692 | 1380941 | #105 | <i>cgR_1259</i> | <i>argS</i>  | 0.55 | arginyl-tRNA synthetase                                             |
| 1380692 | 1380941 | #105 | <i>cgR_1258</i> |              | 0.55 | putative secreted hydrolase                                         |
| 555468  | 555717  | #049 | <i>cgR_0497</i> |              | 0.55 | ABC transport system permease protein                               |
| 3274821 | 3275070 | #245 | <i>cgR_2951</i> |              | 0.55 | putative secreted protein                                           |
| 2216012 | 2216261 | #161 | <i>cgR_2013</i> | <i>dnaE1</i> | 0.55 | putative DNA polymerase III, alpha chain                            |
| 295420  | 295669  | #021 | <i>cgR_0266</i> | <i>embC</i>  | 0.55 | probable arabinosyltransferase, membrane protein                    |
| 2957963 | 2958212 | #222 | <i>cgR_2672</i> | <i>sseA1</i> | 0.55 | probable thiosulfate sulfurtransferase protein                      |
| 1655085 | 1655334 | #130 | <i>cgR_1494</i> |              | 0.54 | ABC-type multidrug/protein/lipid transport system, ATPase component |
| 3126167 | 3126416 | #234 | <i>cgR_2813</i> |              | 0.54 | putative membrane protein                                           |
| 1368019 | 1368268 | #101 | <i>cgR_1249</i> |              | 0.54 | ATPase involved in DNA repair                                       |
| 1511958 | 1512207 | #115 | <i>cgR_1379</i> |              | 0.53 | putative ATP/GTP-binding protein                                    |
| 2266628 | 2266877 | #165 | <i>cgR_2056</i> |              | 0.53 | hypothetical protein                                                |
| 2266628 | 2266877 | #165 | <i>cgR_2057</i> | <i>pknL</i>  | 0.53 | putative serine/threonine protein kinase                            |
| 482380  | 482629  | #039 | <i>cgR_6021</i> |              | 0.53 | HYPOTHETICAL                                                        |
| 2762230 | 2762479 | #209 | <i>cgR_2499</i> | <i>purC</i>  | 0.53 | phosphoribosylaminoimidazole-succinocarboxamide synthase            |
| 2762230 | 2762479 | #209 | <i>cgR_2500</i> |              | 0.53 | hypothetical protein                                                |
| 478040  | 478289  | #037 | <i>cgR_6019</i> |              | 0.53 | HYPOTHETICAL                                                        |
| 3215488 | 3215737 | #242 | <i>cgR_2897</i> |              | 0.53 | putative membrane protein                                           |
| 713581  | 713830  | #057 | <i>cgR_0657</i> | <i>paaZ</i>  | 0.52 | phenylacetic acid degradation protein paaZ                          |

|         |         |      |                 |              |      |                                                |
|---------|---------|------|-----------------|--------------|------|------------------------------------------------|
| 713581  | 713830  | #057 | <i>cgR_0656</i> | <i>paaY</i>  | 0.52 | hypothetical protein                           |
| 807213  | 807462  | #064 | <i>cgR_0735</i> |              | 0.52 | hypothetical protein                           |
| 2467834 | 2468083 | #185 | <i>cgR_2237</i> | <i>proA</i>  | 0.52 | gamma-glutamyl phosphate reductasetase         |
| 2171110 | 2171359 | #156 | <i>cgR_1972</i> |              | 0.52 | hypothetical protein                           |
| 184401  | 184650  | #013 | <i>cgR_0169</i> | <i>mcrB</i>  | 0.51 | 5-methylcytosine-specific restriction enzyme B |
| 366079  | 366328  | #025 | <i>cgR_0326</i> |              | 0.50 | bacterial regulatory proteins, TetR family     |
| 849761  | 850010  | #071 | <i>cgR_0770</i> |              | 0.50 | hypothetical protein                           |
| 1300033 | 1300282 | #095 | <i>cgR_1194</i> | <i>folP2</i> | 0.50 | dihydropteroate synthase                       |
| 1840134 | 1840383 | #141 | <i>cgR_1653</i> | <i>dfp</i>   | 0.50 | DNA/pantothenate metabolism flavoprotein       |

<sup>a</sup> and <sup>b</sup> Peak start and end sites detected in ChIP-chip analysis in the *C. glutamicum* R genome (Yukawa et al., 2007) are indicated.

<sup>c</sup> Relative peak height ratio of the array data in the ChIP-DNA to Input-DNA are shown in the base 2 logarithm.
