# Supplementary material
Source: PubMed Central journal article supplement (PMC4135683)
Supplement: JB.01860-14_zjb999093292so2.pdf [file JB.01860-14_zjb999093292so2.pdf]

**TABLE S2.** *C. glutamicum* genes showing altered expression in the *gntR1* deleted strain

| Gene ID         | Gene Name    | $\Delta gntR1/wt$ mRNA ratio | COG | function                                                                          |
|-----------------|--------------|------------------------------|-----|-----------------------------------------------------------------------------------|
| <i>cgR_2434</i> | <i>gntR1</i> | <0.01                        | K   | bacterial regulatory proteins, GntR family                                        |
| <i>cgR_2885</i> |              | 0.03                         | I   | myo-inositol-1-phosphate synthase 5.5.1.4                                         |
| <i>cgR_6001</i> |              | 0.15                         |     |                                                                                   |
| <i>cgR_1331</i> |              | 0.21                         | G   | secreted sugar-binding protein                                                    |
| <i>cgR_1329</i> |              | 0.22                         | G   | ABC-type sugar (aldose) transport system, ATPase component                        |
| <i>cgR_1328</i> |              | 0.22                         | K   | LacI-family transcriptional regulator, probable catabolite control protein        |
| <i>cgR_1332</i> |              | 0.23                         | G   | uncharacterized component of ribose/xylose transport systems                      |
| <i>cgR_1330</i> |              | 0.25                         | G   | ribose/xylose/arabinose/galactoside ABC-type transport system, permease component |
| <i>cgR_6073</i> |              | 0.27                         |     |                                                                                   |
| <i>cgR_2774</i> |              | 0.28                         |     | hypothetical protein                                                              |
| <i>cgR_5042</i> |              | 0.29                         |     | hypothetical protein                                                              |
| <i>cgR_1425</i> | <i>ptsG</i>  | 0.29                         | G   | phosphotransferase system, glucose-specific IIABC component 2.7.1.69              |
| <i>cgR_2794</i> |              | 0.29                         |     | hypothetical protein                                                              |
| <i>cgR_0932</i> |              | 0.30                         |     | hypothetical protein                                                              |
| <i>cgR_1038</i> | <i>gapB</i>  | 0.31                         | G   | glyceraldehyde 3-phosphate dehydrogenase B 1.2.1.12                               |
| <i>cgR_5050</i> |              | 0.31                         |     | hypothetical protein                                                              |
| <i>cgR_5000</i> |              | 0.31                         |     | hypothetical protein                                                              |
| <i>cgR_2206</i> | <i>rbsK2</i> | 0.32                         | G   | probable ribokinase protein 2.7.1.15                                              |
| <i>cgR_0687</i> |              | 0.32                         |     | acetyltransferase, GNAT family                                                    |
| <i>cgR_5009</i> |              | 0.34                         |     | hypothetical protein                                                              |
| <i>cgR_1511</i> |              | 0.35                         | P   | siderophore-interacting protein                                                   |
| <i>cgR_1384</i> |              | 0.36                         |     | hypothetical protein                                                              |
| <i>cgR_1431</i> | <i>rbsK1</i> | 0.38                         | G   | putative ribokinase protein 2.7.1.15                                              |
| <i>cgR_1992</i> |              | 0.38                         | QR  | SAM-dependent methyltransferase                                                   |
| <i>cgR_2362</i> |              | 0.38                         |     | hypothetical protein                                                              |
| <i>cgR_0688</i> |              | 0.38                         |     | hypothetical protein                                                              |
| <i>cgR_1432</i> | <i>ccpA</i>  | 0.39                         | K   | probable LacI-family transcriptional regulator                                    |
| <i>cgR_2692</i> |              | 0.39                         |     | hypothetical protein                                                              |
| <i>cgR_1339</i> | <i>lysE</i>  | 0.39                         | R   | lysine efflux permease                                                            |

|                 |                   |      |    |                                                            |
|-----------------|-------------------|------|----|------------------------------------------------------------|
| <i>cgR_6068</i> |                   | 0.40 |    |                                                            |
| <i>cgR_2245</i> |                   | 0.41 |    | hypothetical protein                                       |
| <i>cgR_5003</i> |                   | 0.42 |    | hypothetical protein                                       |
| <i>cgR_2751</i> | <i>pckA</i>       | 0.42 | C  | phosphoenolpyruvate carboxykinase 4.1.1.32                 |
| <i>cgR_1375</i> |                   | 0.43 | K  | putative TetR-family transcriptional regulator             |
| <i>cgR_1116</i> |                   | 0.43 | QR | short chain dehydrogenase                                  |
| <i>cgR_6003</i> |                   | 0.43 |    |                                                            |
| <i>cgR_5037</i> |                   | 0.43 |    | hypothetical protein                                       |
| <i>cgR_1409</i> | <i>PPCgR</i><br>2 | 0.43 |    | probable phage-type integrase                              |
| <i>cgR_6142</i> |                   | 0.43 |    |                                                            |
| <i>cgR_0151</i> | <i>ISCgR4</i>     | 0.43 | L  | putative transposase                                       |
| <i>cgR_2631</i> |                   | 0.43 |    | hypothetical protein                                       |
| <i>cgR_6002</i> |                   | 0.43 |    |                                                            |
| <i>cgR_1969</i> |                   | 0.44 |    | putative membrane protein                                  |
| <i>cgR_2316</i> |                   | 0.44 |    | hypothetical protein                                       |
| <i>cgR_2304</i> | <i>dctP2</i>      | 0.44 | G  | putative TRAP dicarboxylate transporter, DctP subunit      |
| <i>cgR_2335</i> |                   | 0.44 |    | hypothetical protein                                       |
| <i>cgR_0358</i> |                   | 0.44 |    | hypothetical protein                                       |
| <i>cgR_0134</i> |                   | 0.44 |    | hypothetical protein                                       |
| <i>cgR_2765</i> |                   | 0.44 |    | hypothetical protein                                       |
| <i>cgR_0043</i> |                   | 0.45 | P  | ABC transport protein, ATP-binding subunit                 |
| <i>cgR_5054</i> |                   | 0.45 |    | hypothetical protein                                       |
| <i>cgR_2436</i> |                   | 0.45 |    | hypothetical protein                                       |
| <i>cgR_0550</i> |                   | 0.45 |    | putative secreted protein                                  |
| <i>cgR_2748</i> |                   | 0.45 | M  | glycosyltransferase 2.4.1.-                                |
| <i>cgR_1429</i> | <i>iunH3</i>      | 0.46 | F  | inosine-uridine preferring nucleoside hydrolase 3.2.2.1    |
| <i>cgR_6043</i> |                   | 0.46 |    |                                                            |
| <i>cgR_1447</i> | <i>ugpE</i>       | 0.46 | G  | sn-glycerol-3-phosphate transport system permease protein  |
| <i>cgR_2951</i> |                   | 0.46 |    | putative secreted protein                                  |
| <i>cgR_0582</i> | <i>gabT</i>       | 0.47 | E  | probable 4-aminobutyrate aminotransferase protein 2.6.1.19 |
| <i>cgR_1212</i> |                   | 0.48 |    | putative secreted protein                                  |
| <i>cgR_2940</i> |                   | 0.48 | K  | bacterial regulatory protein, TetR family                  |
| <i>cgR_2371</i> | <i>dhaS</i>       | 0.48 | C  | NADP-dependent aldehyde dehydrogenase 1.2.1.3              |
| <i>cgR_2895</i> | <i>maeB</i>       | 0.48 | C  | malic enzyme 1.1.1.40                                      |
| <i>cgR_2374</i> |                   | 0.48 |    | hypothetical protein                                       |

|                 |                           |      |          |                                                                                    |
|-----------------|---------------------------|------|----------|------------------------------------------------------------------------------------|
| <i>cgR_1445</i> |                           | 0.48 |          | hypothetical protein                                                               |
| <i>cgR_0531</i> |                           | 0.48 |          | hypothetical protein                                                               |
| <i>cgR_5048</i> |                           | 0.48 | P        | hypothetical protein                                                               |
| <i>cgR_6158</i> |                           | 0.48 |          |                                                                                    |
| <i>cgR_1430</i> |                           | 0.49 | GEP<br>R | permease of the major facilitator superfamily                                      |
| <i>cgR_6150</i> |                           | 0.49 |          |                                                                                    |
| <i>cgR_0729</i> |                           | 0.49 |          | hypothetical protein                                                               |
| <i>cgR_1250</i> | <i>lipP</i>               | 0.49 | I        | lipase 3.1.1.3                                                                     |
| <i>cgR_2211</i> | <i>aceB</i>               | 0.50 | C        | malate synthase 2.3.3.9                                                            |
| <i>cgR_0163</i> | <i>merA2</i>              | 0.50 | C        | mercuric reductase 1.16.1.1                                                        |
| <i>cgR_5036</i> |                           | 0.50 |          | hypothetical protein                                                               |
| <i>cgR_2660</i> |                           | 0.50 |          | putative secreted protein                                                          |
| <i>cgR_2544</i> |                           | 0.51 |          | hypothetical protein                                                               |
| <i>cgR_6135</i> |                           | 0.51 |          |                                                                                    |
| <i>cgR_2152</i> |                           | 0.51 |          | hypothetical protein                                                               |
| <i>cgR_2370</i> |                           | 0.51 |          | AraC-type regulator                                                                |
| <i>cgR_1882</i> | <i>PPCgR</i><br>6         | 0.51 | M        | hypothetical protein                                                               |
| <i>cgR_1293</i> |                           | 0.51 |          | hypothetical protein                                                               |
| <i>cgR_2578</i> |                           | 0.51 |          | hypothetical protein                                                               |
| <i>cgR_2075</i> |                           | 0.51 |          | putative membrane protein                                                          |
| <i>cgR_2798</i> |                           | 0.51 | S        | hypothetical protein                                                               |
| <i>cgR_2797</i> |                           | 0.51 |          | hypothetical protein                                                               |
| <i>cgR_1741</i> |                           | 0.52 |          | hypothetical protein                                                               |
| <i>cgR_6067</i> |                           | 0.52 |          |                                                                                    |
| <i>cgR_6114</i> |                           | 0.52 |          |                                                                                    |
| <i>cgR_0430</i> |                           | 0.52 |          | hypothetical protein                                                               |
| <i>cgR_2990</i> |                           | 0.52 |          | hypothetical protein                                                               |
| <i>cgR_2285</i> | <i>benA</i>               | 0.52 | PR       | benzoate 1,2-dioxygenase alpha subunit (aromatic ring hydroxylation dioxygenase A) |
| <i>cgR_5049</i> |                           | 0.53 |          | hypothetical protein                                                               |
| <i>cgR_1410</i> | <i>ISCg11</i><br><i>b</i> | 0.53 | L        | transposase                                                                        |
| <i>cgR_0583</i> | <i>gabD2</i>              | 0.53 | C        | putative succinate-semialdehyde dehydrogenase (NADP+)<br>1.2.1.16                  |

|                 |              |      |    |                                                                          |
|-----------------|--------------|------|----|--------------------------------------------------------------------------|
| <i>cgR_2212</i> | <i>aceA</i>  | 0.53 | C  | isocitrate lyase 4.1.3.1                                                 |
| <i>cgR_0535</i> | <i>resI</i>  | 0.53 | L  | resolvase family recombinase                                             |
| <i>cgR_2389</i> |              | 0.53 |    | hypothetical protein                                                     |
| <i>cgR_6046</i> |              | 0.54 |    |                                                                          |
| <i>cgR_0604</i> |              | 0.54 | C  | acetyl-CoA transferase                                                   |
| <i>cgR_2693</i> |              | 0.54 |    | hypothetical protein                                                     |
| <i>cgR_0002</i> |              | 0.54 |    | hypothetical protein                                                     |
| <i>cgR_0335</i> | <i>brnF</i>  | 0.54 | E  | branched chain amino acid exporter, large subunit                        |
| <i>cgR_0554</i> |              | 0.55 |    | hypothetical protein                                                     |
| <i>cgR_2319</i> |              | 0.55 | R  | putative membrane protein                                                |
| <i>cgR_5025</i> |              | 0.55 |    | hypothetical protein                                                     |
| <i>cgR_0084</i> | <i>phoH1</i> | 0.55 | T  | ATPase related to phosphate starvation-inducible protein                 |
| <i>cgR_6033</i> |              | 0.56 |    |                                                                          |
| <i>cgR_0052</i> |              | 0.56 |    | hypothetical protein                                                     |
| <i>cgR_1858</i> |              | 0.56 | O  | predicted ATPase with chaperone activity                                 |
| <i>cgR_6127</i> |              | 0.56 |    |                                                                          |
| <i>cgR_0063</i> |              | 0.56 |    | hypothetical protein                                                     |
| <i>cgR_2315</i> |              | 0.57 |    | hypothetical protein                                                     |
| <i>cgR_0477</i> |              | 0.57 |    | hypothetical protein                                                     |
| <i>cgR_0067</i> |              | 0.57 |    | hypothetical protein                                                     |
| <i>cgR_1031</i> |              | 0.57 | E  | ABC-type branched-chain amino acid transport systems, secreted component |
| <i>cgR_0911</i> |              | 0.57 | F  | putative cytidine deaminase                                              |
| <i>cgR_2837</i> |              | 0.57 |    | permease of the major facilitator superfamily                            |
| <i>cgR_0349</i> | <i>madM</i>  | 0.57 |    | malonate transporter MadM subunit                                        |
| <i>cgR_0968</i> |              | 0.57 |    | hypothetical protein                                                     |
| <i>cgR_0157</i> |              | 0.58 | K  | Iron dependent repressor                                                 |
| <i>cgR_1821</i> |              | 0.58 | EP | ABC-type peptide transport system, permease component                    |
| <i>cgR_5060</i> |              | 0.58 |    | hypothetical protein                                                     |
| <i>cgR_0336</i> | <i>brnE</i>  | 0.58 |    | branched chain amino acid exporter, small subunit                        |
| <i>cgR_0317</i> |              | 0.58 |    | hypothetical protein                                                     |
| <i>cgR_2686</i> |              | 0.58 | C  | aldehyde dehydrogenase 1.2.1.3                                           |
| <i>cgR_2224</i> |              | 0.59 |    | hypothetical protein                                                     |
| <i>cgR_2461</i> |              | 0.59 |    | hypothetical protein                                                     |
| <i>cgR_0012</i> |              | 0.59 |    | helix-turn-helix protein, CopG family                                    |
| <i>cgR_1412</i> |              | 0.59 |    | hypothetical protein                                                     |

|                 |               |      |    |                                                                                                         |
|-----------------|---------------|------|----|---------------------------------------------------------------------------------------------------------|
| <i>cgR_2724</i> | <i>hmp</i>    | 0.59 | C  | flavoheprotein 1.5.1.34                                                                                 |
| <i>cgR_6042</i> |               | 0.59 |    |                                                                                                         |
| <i>cgR_6134</i> |               | 0.59 |    |                                                                                                         |
| <i>cgR_2259</i> |               | 0.60 | EP | ABC-type dipeptide/oligopeptide/nickel transport system, secreted component                             |
| <i>cgR_0385</i> |               | 0.60 | E  | putative phosphatase                                                                                    |
| <i>cgR_1029</i> |               | 0.60 |    | hypothetical protein                                                                                    |
| <i>cgR_0585</i> |               | 0.60 | P  | cation-transporting ATPase 3.6.1.-                                                                      |
| <i>cgR_0803</i> |               | 0.60 |    | hypothetical protein                                                                                    |
| <i>cgR_0118</i> | <i>ISCgR1</i> | 0.60 | L  | putative transposase                                                                                    |
| <i>cgR_1055</i> |               | 0.60 | Q  | ABC-type multidrug/protein/lipid transport system, ATPase component                                     |
| <i>cgR_0150</i> | <i>ISCgR4</i> | 0.60 |    | putative transposase                                                                                    |
| <i>cgR_1993</i> | <i>gip</i>    | 0.60 | G  | putative hydroxypyruvate isomerase protein 5.3.1.22                                                     |
| <i>cgR_5051</i> |               | 0.61 |    | putative secreted protein                                                                               |
| <i>cgR_6152</i> |               | 0.61 |    |                                                                                                         |
| <i>cgR_6153</i> |               | 0.61 |    |                                                                                                         |
| <i>cgR_1393</i> |               | 0.61 |    | hypothetical protein                                                                                    |
| <i>cgR_5039</i> |               | 0.61 |    | hypothetical protein                                                                                    |
| <i>cgR_1352</i> |               | 0.61 | P  | ABC-type nitrate/sulfonate/taurine/bicarbonate transport system, ATPase component (N-terminal fragment) |
| <i>cgR_0309</i> |               | 0.62 | Q  | putative ABC transporter transmembrane subunit                                                          |
| <i>cgR_0338</i> |               | 0.62 | K  | hypothetical protein                                                                                    |
| <i>cgR_1820</i> |               | 0.62 | EP | ABC-type peptide transport system, permease component                                                   |
| <i>cgR_6133</i> |               | 0.63 |    |                                                                                                         |
| <i>cgR_6012</i> |               | 0.63 |    |                                                                                                         |
| <i>cgR_0584</i> |               | 0.63 | E  | permease for amino acids and related compounds, family                                                  |
| <i>cgR_0917</i> |               | 0.63 |    | hypothetical protein                                                                                    |
| <i>cgR_5053</i> |               | 0.63 |    | hypothetical protein                                                                                    |
| <i>cgR_2961</i> |               | 0.63 | R  | hypothetical protein                                                                                    |
| <i>cgR_1918</i> |               | 0.63 | S  | putative antirepressor                                                                                  |
| <i>cgR_1270</i> | <i>mog</i>    | 0.63 | H  | putative molybdopterin biosynthesis MOG protein                                                         |
| <i>cgR_2421</i> |               | 0.63 |    | hypothetical protein                                                                                    |
| <i>cgR_0171</i> | <i>ISCgR7</i> | 0.63 | L  | putative transposase                                                                                    |
| <i>cgR_0815</i> | <i>prpB1</i>  | 0.63 | G  | probable methylisocitric acid lyase 4.1.3.30                                                            |
| <i>cgR_5058</i> |               | 0.64 |    | hypothetical protein                                                                                    |

|                 |              |      |    |                                                                                           |
|-----------------|--------------|------|----|-------------------------------------------------------------------------------------------|
| <i>cgR_1136</i> |              | 0.64 | MG | short chain dehydrogenase                                                                 |
| <i>cgR_2136</i> |              | 0.64 |    | hypothetical protein                                                                      |
| <i>cgR_0085</i> |              | 0.64 |    | hypothetical protein                                                                      |
| <i>cgR_0046</i> |              | 0.64 | G  | probable ABC transport protein, ATP-binding component                                     |
| <i>cgR_1759</i> |              | 0.64 |    | hypothetical protein                                                                      |
| <i>cgR_2857</i> |              | 0.64 | E  | putative regulatory protein                                                               |
| <i>cgR_5002</i> |              | 0.64 |    | membrane protein                                                                          |
| <i>cgR_1822</i> |              | 0.64 | R  | ATPase component of peptide ABC-type transport system, contains duplicated ATPase domains |
| <i>cgR_0778</i> | <i>prpB2</i> | 0.64 | G  | probable methylisocitric acid lyase 4.1.3.30                                              |
| <i>cgR_2562</i> |              | 0.64 |    | putative membrane protein                                                                 |
| <i>cgR_6126</i> |              | 0.64 |    |                                                                                           |
| <i>cgR_6013</i> |              | 0.65 |    |                                                                                           |
| <i>cgR_2901</i> |              | 0.65 |    | putative membrane protein                                                                 |
| <i>cgR_1446</i> | <i>ugpA</i>  | 0.65 | G  | sn-glycerol-3-phosphate transport system permease protein                                 |
| <i>cgR_6100</i> |              | 0.65 |    |                                                                                           |
| <i>cgR_1418</i> |              | 0.65 |    | putative membrane protein                                                                 |
| <i>cgR_0350</i> | <i>madL</i>  | 0.65 |    | malonate transporter MadL subunit                                                         |
| <i>cgR_1819</i> |              | 0.65 | EP | ABC-type peptide transport system, secreted component                                     |
| <i>cgR_2253</i> |              | 0.65 |    | putative secreted or membrane protein                                                     |
| <i>cgR_0170</i> | <i>mcrC</i>  | 0.65 |    | putative protein mcrC                                                                     |
| <i>cgR_2284</i> | <i>catA1</i> | 0.65 | Q  | catechol 1,2-dioxygenase 1.13.11.1                                                        |
| <i>cgR_0044</i> |              | 0.65 | G  | probable solute-binding lipoprotein, signal peptide                                       |
| <i>cgR_1376</i> |              | 0.65 |    | hypothetical protein                                                                      |
| <i>cgR_0558</i> |              | 0.65 |    | hypothetical protein                                                                      |
| <i>cgR_2469</i> | <i>sucC</i>  | 0.66 | C  | succinyl-CoA synthetase beta chain 6.2.1.5                                                |
| <i>cgR_0737</i> |              | 0.66 | L  | polymerase involved in DNA repair                                                         |
| <i>cgR_1949</i> |              | 0.66 |    | putative hemagglutinin-related protein                                                    |
| <i>cgR_2400</i> | <i>pncA</i>  | 0.66 | Q  | nicotinamidase/pyrazinamidase 3.5.1.-                                                     |
| <i>cgR_0564</i> |              | 0.66 |    | putative membrane protein                                                                 |
| <i>cgR_2355</i> |              | 0.66 |    | hypothetical protein                                                                      |
| <i>cgR_1233</i> | <i>cydA</i>  | 1.50 | C  | cytochrome d ubiquinol oxidase subunit I 1.10.3.-                                         |
| <i>cgR_1863</i> |              | 1.52 | P  | ABC-type cobalamin/Fe <sup>3+</sup> -siderophores transport system, secreted component    |
| <i>cgR_5017</i> |              | 1.52 |    | hypothetical protein                                                                      |
| <i>cgR_2263</i> |              | 1.53 | K  | bacterial regulatory proteins, TetR family                                                |

|                 |             |      |          |                                                                                 |
|-----------------|-------------|------|----------|---------------------------------------------------------------------------------|
| <i>cgR_2942</i> | <i>tcbF</i> | 1.53 | C        | maleylacetate reductasetase 1.3.1.32                                            |
| <i>cgR_6137</i> |             | 1.53 |          |                                                                                 |
| <i>cgR_1691</i> |             | 1.53 | R        | putative NADH-dependent FMN reductase 1.5.1.29                                  |
| <i>cgR_2646</i> |             | 1.54 | GEP<br>R | permease of the major facilitator superfamily[nebacterium glutamicum]           |
| <i>cgR_0924</i> |             | 1.55 | P        | ABC-type cobalamin/Fe <sup>3+</sup> -siderophores transport system              |
| <i>cgR_2170</i> |             | 1.55 | Q        | putative beta (1-->2) glucan export composite transmembrane/ATP-binding protein |
| <i>cgR_2208</i> |             | 1.55 | S        | uncharacterized iron-regulated membrane protein                                 |
| <i>cgR_1717</i> |             | 1.55 | P        | predicted iron-dependent peroxidase, secreted protein                           |
| <i>cgR_1039</i> | <i>pth1</i> | 1.57 | J        | probable peptidyl-tRNA hydrolase protein 3.1.1.29                               |
| <i>cgR_2894</i> |             | 1.58 | G        | putative arabinose efflux permease                                              |
| <i>cgR_0672</i> |             | 1.58 | S        | secreted protein                                                                |
| <i>cgR_1514</i> |             | 1.58 | Q        | uncharacterized protein, possibly involved in aromatic compounds catabolism     |
| <i>cgR_1625</i> | <i>tal</i>  | 1.59 | G        | transaldolase 2.2.1.2                                                           |
| <i>cgR_2946</i> |             | 1.61 | G        | sugar phosphate isomerase/epimerase                                             |
| <i>cgR_1589</i> |             | 1.61 | S        | putative membrane protein                                                       |
| <i>cgR_1627</i> | <i>opcA</i> | 1.62 | S        | putative subunit of glucose-6-P dehydrogenase                                   |
| <i>cgR_1231</i> | <i>cydD</i> | 1.63 | Q        | ABC-type multidrug/protein/lipid transport system, ATPase component             |
| <i>cgR_0492</i> |             | 1.67 | GEP<br>R | putative integral membrane transport protein                                    |
| <i>cgR_1232</i> | <i>cydB</i> | 1.68 | C        | cytochrome d terminal oxidase polypeptide subunit 1.10.3.-                      |
| <i>cgR_2547</i> | <i>ptsS</i> | 1.69 | G        | enzyme II sucrose protein 2.7.1.69                                              |
| <i>cgR_1626</i> | <i>zwf</i>  | 1.70 | G        | glucose-6-phosphate 1-dehydrogenase 1.1.1.49                                    |
| <i>cgR_0145</i> |             | 1.71 | K        | putative transcription regulator                                                |
| <i>cgR_2802</i> |             | 1.73 | S        | putative carboxymuconolactone decarboxylase subunit                             |
| <i>cgR_0493</i> |             | 1.73 | G        | sugar phosphate isomerases/epimerases                                           |
| <i>cgR_2732</i> |             | 1.73 | PH       | putative iron-siderophore uptake system transmembr                              |
| <i>cgR_1230</i> | <i>cydC</i> | 1.76 | Q        | ABC-type multidrug/protein/lipid transport system, ATPase component             |
| <i>cgR_0144</i> |             | 1.76 | R        | hypothetical protein                                                            |
| <i>cgR_2388</i> | <i>betT</i> | 1.76 | M        | high-affinity choline transport protein                                         |
| <i>cgR_5055</i> |             | 1.77 |          | hypothetical protein                                                            |
| <i>cgR_2799</i> |             | 1.78 | Q        | putative aryldialkylphosphatase                                                 |

|                 |              |       |          |                                                                       |
|-----------------|--------------|-------|----------|-----------------------------------------------------------------------|
| <i>cgR_1624</i> | <i>tkt</i>   | 1.82  | G        | transketolase 2.2.1.1                                                 |
| <i>cgR_2896</i> | <i>gntK</i>  | 1.83  | G        | putative gluconate kinase 2.7.1.12                                    |
| <i>cgR_2801</i> |              | 1.86  | E        | putative aminotransferase 2.6.1.-                                     |
| <i>cgR_2647</i> |              | 1.87  | P        | Na <sup>+</sup> /phosphate symporter                                  |
| <i>cgR_1528</i> |              | 1.99  | GEP<br>R | permease of the major facilitator superfamily                         |
| <i>cgR_0440</i> | <i>galU2</i> | 2.01  | M        | putative UTP-glucose-1-phosphate uridylyltransferase 2.7.7.9          |
| <i>cgR_2800</i> |              | 2.04  | GEP<br>R | putative transmembrane transport protein                              |
| <i>cgR_2948</i> | <i>idhA2</i> | 2.08  | R        | myo-inositol 2-dehydrogenase 1.1.1.18                                 |
| <i>cgR_2730</i> | <i>fepB2</i> | 2.10  | P        | ferrienterobactin-binding periplasmic protein precursor               |
| <i>cgR_1628</i> | <i>devB</i>  | 2.14  | G        | putative 6-phosphogluconolactonase 3.1.1.31                           |
| <i>cgR_1623</i> | <i>ctaB</i>  | 2.16  | H        | polyprenyltransferase (cytochrome oxidase assembly factor)<br>2.5.1.- |
| <i>cgR_2209</i> |              | 2.27  | R        | predicted Na <sup>+</sup> -dependent transporter                      |
| <i>cgR_2102</i> |              | 2.30  | GEP<br>R | permease of the major facilitator superfamily                         |
| <i>cgR_2731</i> |              | 2.39  | PH       | ferric enterobactin transport protein                                 |
| <i>cgR_2947</i> | <i>idhA1</i> | 2.40  | R        | myo-inositol 2-dehydrogenase 1.1.1.18                                 |
| <i>cgR_2451</i> |              | 2.40  | C        | Na <sup>+</sup> /H <sup>+</sup> -dicarboxylate symporter family       |
| <i>cgR_2806</i> | <i>gntP</i>  | 2.79  | GE       | gluconate permease                                                    |
| <i>cgR_2945</i> |              | 3.14  | R        | predicted dehydrogenase                                               |
| <i>cgR_1513</i> | <i>gnd</i>   | 3.65  | G        | 6-phosphogluconate dehydrogenase 1.1.1.44                             |
| <i>cgR_2497</i> | <i>dctA</i>  | 4.17  | C        | Na <sup>+</sup> /H <sup>+</sup> -dicarboxylate symporter              |
| <i>cgR_2220</i> | <i>dctM1</i> | 5.06  | S        | putative C4-dicarboxylate transport system (permease large protein)   |
| <i>cgR_2608</i> | <i>bglG2</i> | 5.48  | K        | beta-glucoside operon antiterminator                                  |
| <i>cgR_2222</i> | <i>dctP1</i> | 7.77  | G        | putative C4-dicarboxylate-binding protein                             |
| <i>cgR_2221</i> | <i>dctX</i>  | 8.33  | S        | putative C4-dicarboxylate transport system (permease small protein)   |
| <i>cgR_2609</i> | <i>bglA2</i> | 8.73  | G        | beta-glucosidase 3.2.1.21                                             |
| <i>cgR_2454</i> |              | 9.01  | G        | sugar phosphate isomerase/epimerase                                   |
| <i>cgR_2610</i> | <i>bglF2</i> | 9.40  | G        | PTS system beta-glucoside-specific enzyme IIABC component<br>2.7.1.69 |
| <i>cgR_2456</i> |              | 10.67 | R        | putative lipopolysaccharide biosynthesis protein                      |
| <i>cgR_0402</i> | <i>bglS</i>  | 10.72 | G        | putative beta-glucosidase 3.2.1.21                                    |



|                 |             |       |   |                                                                       |
|-----------------|-------------|-------|---|-----------------------------------------------------------------------|
| <i>cgR_2455</i> |             | 11.43 | R | predicted dehydrogenase or related protein                            |
| <i>cgR_2457</i> |             | 12.11 | G | putative sugar phosphate isomerase epimerase                          |
| <i>cgR_2459</i> |             | 13.15 | G | putative glucuronide permease                                         |
| <i>cgR_2727</i> | <i>bglG</i> | 17.97 | K | transcriptional antiterminator                                        |
| <i>cgR_2728</i> | <i>bglA</i> | 20.13 | G | beta-glucosidase 3.2.1.86                                             |
| <i>cgR_2729</i> | <i>bglF</i> | 33.49 | G | PTS system beta-glucoside-specific enzyme IIABC component<br>2.7.1.69 |
| <i>cgR_2397</i> | <i>gntV</i> | 60.60 | P | putative gluconokinase 2.7.1.12                                       |

---

The mRNA ratios shown represent mean values from three independent microarray experiments. The table includes those genes which showed more than 1.5-fold change mRNA level in  $\Delta gntR1$  versus wild type. The genes are ordered according to the mRNA ratio of this comparison.
