# Supplementary material
Source: PubMed Central journal article supplement (PMC4135683)
Supplement: JB.01860-14_zjb999093292so3.pdf [file JB.01860-14_zjb999093292so3.pdf]

**FIG. S1. Expression of *gnd* mRNA in the strain with modified *gntR1* gene.** Total RNAs prepared from wild-type, KT8 ( $\Delta gntR1$ ) and IT01 (*gntR1-FLAG*) cells grown in nutrient-rich A medium supplemented with 2.0% (w/v) glucose were subjected to qRT-PCR analysis using primers specific for the *gnd*. The relative mRNA level is indicated as the ratio against wild-type *gnd* expression level. The values are the means of three independent experiments and standard deviations are indicated on the bar tops.

**FIG. S2. The nucleotide sequences of the *icd*, *gapB*, *pyk*, and *maeB* promoter region.** Transcriptional start sites experimentally determined previously (1, 2) are shown by an arrow. Translation initiation codons are boxed. GntR1 consensus binding sequences are depicted as bold letter and mutated sequence used in this study is depicted below the corresponding site.

**FIG. S3. Purification of Hexa-Histidine-tagged GntR1.** The hexa-histidine-tagged GntR1 protein was overexpressed and purified by using pColdI system (3). Purified GntR1 protein was analyzed by 12% SDS-protein gel electrophoresis and stained with CBB. Sizes of molecular mass marker are shown on the left of the panel.

## REFERENCES

1. Han SO, Inui M, Yukawa H. 2008. Transcription of *Corynebacterium glutamicum* genes involved in tricarboxylic acid cycle and glyoxylate cycle. *J. Mol. Microbiol. Biotechnol.* **15**:264-276.
2. Han SO, Inui M, Yukawa H. 2007. Expression of *Corynebacterium glutamicum* glycolytic genes varies with carbon source and growth phase. *Microbiology* **153**:2190-2202.
3. Tanaka Y, Ehira S, Teramoto H, Inui M, Yukawa H. 2012. Coordinated regulation of *gnd*, which encodes 6-phosphogluconate dehydrogenase, by the two transcriptional regulators GntR1 and RamA in *Corynebacterium glutamicum*. *J. Bacteriol.* **194**:6527-6536.
