# Supplementary material
Source: PubMed Central journal article supplement (PMC4135683)
Supplement: JB.01860-14_zjb999093292so5.pdf [file JB.01860-14_zjb999093292so5.pdf]

*icd*

GCCTCCATCACTGTGAAGTGGCTACCCCGAAATGGCCGTCCACATGGGGAATTACTCAA  
AGAAGCATTTGGCCATCCACCATATGGAGGAAGACGCCGCCACCAGAACTCTTAT  
GGGAACTCCCGAGTACTCTTCCACGGGAGA**AAAGATCACACCAAG**TCGAGCTCGCGGG  
mut: AGATCT  
GACGATTATTACTGGATCGCCGGTGAAGCGGTGTGGTCACCAGCATTCGTCGATCCCT  
CGTGAAGGAGAAGGGACTCGACCGATCTCAGGTGGCATTCATGGGCTACTGGAACATG  
GAGTTTCTATGAAGGGATAAAAACCCACCCACACACGTCAGCAATGCGTGGAACCCCT  
GTATTCTAGGTAGCT**G**AACAAAAGAGCCCATCAACCAAGGAGACT**ATG**GCCAAGATCATT  
-10

*gapB*

GGTTTGGAAATCGGTGTCCCTCGCGCATTTTTCGGGCCGTATGCAAGGGGAGTGGAAC  
CAGGTTCAACCGTTTCGAACGAGGGGTACCCCGTTGTACCCATATCTCAACCC**AAATGA**  
mut: AG  
**TCACATCTTT**GCGTAAGGCGGCAGGAAGTGCAGGGAACGGGATTACGCCACTGCCCTG  
ATCT  
GTAGGAGTCGGCCTGGAATCGATTGCGAAGGGTGGTGCAAAGCAGATACTGGAATCATT  
AACACCTTCCGCTTTGGGC**TAATGT**TGGGG**G**GAGTGC'TTTCAACTATCCACGAGAGCC  
-10  
ACCCAGTGATAAACCCCGGGTTAACCCACGCCTAAGTCAGTGAAGGACTTTTTATGAC  
GCACAACCACAAGGACTGGAACGATCGCATCGCAGTTGCGGAGGAC**ATG**GTGCCGTTGATC

*pyk*

TCAACACCATCGTCTCCGCAGTAGTGT'TTGCCGGCGCGATAATCGTGT'TC'TTCC'TGTTG  
AAGAAGGGTAGGGAAACTCCCGAAGAGGTAGATCCGACT'TTCGCAGCGTCTGT'TGCAGC  
AGATGCTGTAGCTTTCGCCAGATGGAAAACCC'TTGCCGAAAGCAGGGGAGGGCATTGATG  
GAGAAACGCCCTCAACGCGATAGGTTTCAACCATAGGCC'TGACCTGGCTGAGATG'TTTT  
TGGTAGAAAAACCGAGTGTCCGAATTG'TTTTGTGGGTGCCCGG'TTTTTTCTGATTTAAG  
CACGTCAGAGGCGTAGAACATTGTCTGTCCACACTCTGGGTGCGAAGATTCATCGAGAA  
TT**AAATGGTAGTACC**TGGCTTGGGGGGAATGACGTACTAGGCTT**ATG**GGCGTGGATAGA  
mut: AGATCT

*maeB*

TATCAAGTGGGTATCGGTCTGGCGCGGCTCTTGCGCGATGGCTGTGGATGCCGATTGGGTGCTGGC  
ACTTTGTGGATCATGGCTGGACTGTCATTGGCTTCCACGTGGTCTTGGCGCTGTGGTC  
CCGCCCGTACTGAAGTAGCAGCCAAATTCAGCCACTGAATCAACCACTGAACCAAC  
CCAAAACACCC**AAAAGTCACACTTAG**CAAACAATTAAATTCATCACAAAACACCCCT  
mut1: AGATCT  
GTACAAAATTAGCAATAAAGGTCAGGGGTGTTT'TGCAAATGTTACATTCGAAATTTT  
TGT'TGAGCTACATATTTAGCTAGTGT'TT'TGTTCC**A**GAAACCTAAATGAGGT'TCTACCC  
-10  
TTAACAGAGCTTCCCGAAAAACACCGATTAACAAGGCTA**AAATGATATGACCATCG**ACCTG  
mut2: CGCTTA
