# Supplementary material
Source: PubMed Central journal article supplement (PMC4135683)

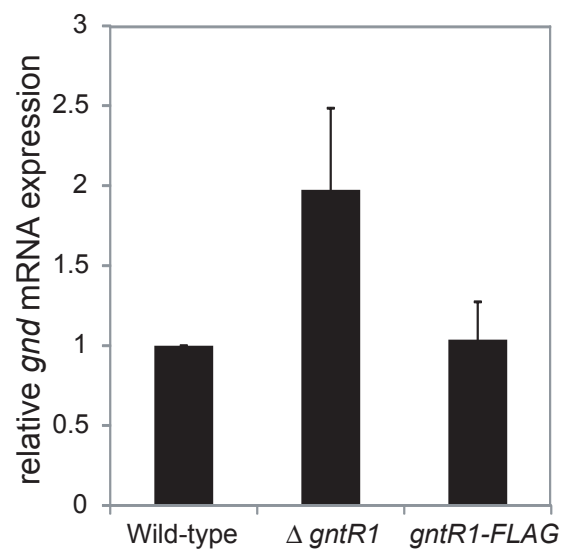

Fig. S1. Tanaka et. al.

Supplement: JB.01860-14_zjb999093292so4.pdf [file JB.01860-14_zjb999093292so4.pdf]

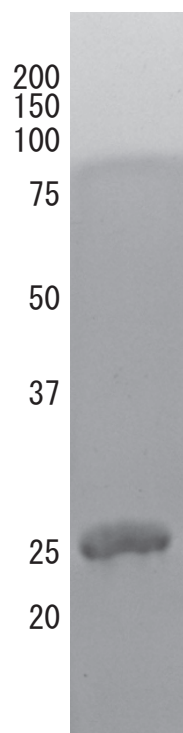

Fig. S3. Tanaka et. al.

Supplement: JB.01860-14_zjb999093292so6.pdf [file JB.01860-14_zjb999093292so6.pdf]
